# Supplementary material for: Nectar robbing by the invasive bumblebee Bombus terrestris (Apidae) changes the behavior of native flower visitors of Fuchsia magellanica Lam. (Onagraceae) but not seed set
Source: PeerJ. 2025 Oct 22;13:e20253. doi: 10.7717/peerj.20253 (PMC12553366; doi:10.7717/peerj.20253)
Supplement: Supplemental Information 1 — Dataset containing field measurements of flower visitation, nectar production, nectar standing crop, and seed set of Fuchsia magellanica across 24 populations in southern Chile. Data correspond to the analyses presented in the main text and supplementary appendices. [file peerj-13-20253-s001.xlsx]

## Sheet: Raw data
Population	Plant	Pollinating visits by S. sephaniodes (visits/flower/10 min)	Pollinating visits by B. dahlbomii (visits/flower/10 min)	Pollinating visits by B. terrestris (visits/flower/10 min)	Pollinating visits by A. mellifera (visits/flower/10 min)	Total pollinating visits (visits/flower/10 min)	Robbing visits by S. sephaniodes (visits/flower/10 min)	Robbing visits by B. dahlbomii (visits/flower/10 min)	Robbing visits by B. terrestris (visits/flower/10 min)	Robbing visits by A. mellifera (visits/flower/10 min)	Total robbing visits (visits/flower/10 min)	Pierced flowers (%)	Standing crop of nectar from pierced flower (µl/flower)	Standing crop of nectar from undamaged flower (µl/flower)	Nectar production rate from pierced flower (µl/flower/24 h)	Nectar production rate from undamaged flower (µl/flower/24 h)	Seeds/flower (+P+R)	Seeds/flower (+P-R)	Seeds/flower (-P-R)
Alerce Andino	1	0	0	0	0	0	0	0	0	0	0	10	0	0.548	nr	22.822	95.64	8.68	0
Alerce Andino	2	0.583333	0	0	0.0833333	0.666667	0	0	0	0	0	0	nr	0.227	nr	10.045	114.12	84.6	7.2
Alerce Andino	3	0	0	0	0	0	0	0	0	0	0	0	nr	0.091	nr	19.935	268.4	47.36	0
Alerce Andino	4	0	0	0	0	0	0	0	0	0	0	0	nr	3.69	nr	14.3633	216.48	87.96	0
Alerce Andino	5	0.25	0	0	0.25	0.5	0	0	0	0	0	0	nr	0.237	nr	25.3175	157.76	11.12	0
Alerce Andino	6	0.272727	0	0	0	0.272727	0	0	0	0	0	0	nr	0	nr	8.825	147.36	0	79.68
Alerce Andino	7	0	0	0	0.5	0.5	0	0	0	0	0	0	nr	2.294	nr	1.855	24.88	0	8.12
Alerce Andino	8	0	0.0588235	0	0.294118	0.352941	0	0	0	0	0	0	nr	0.1	nr	19.3375	0	0	13.08
Alerce Andino	9	0.125	0	0	0.0625	0.1875	0	0	0	0	0	0	nr	0.607	nr	12.88	0	8.68	0
Alerce Andino	10	0	0	0	0.047619	0.047619	0	0	0	0	0	0	nr	0.172	nr	22.6475	159.68	2.28	0
Alerce Andino	11	0	0	0	0	0	0	0	0	0	0	0	nr	0.075	nr	12.03	0	0	0
Alerce Andino	12	0	0	0	0	0	0	0	0	0	0	0	nr	0.553	nr	27.452	386.2	100.44	0
Alerce Andino	13	0	0	0	0.4375	0.4375	0	0	0	0	0	0	nr	1.074	nr	23.01	132.32	0	8
Alerce Andino	14	0	0	0	0.428571	0.428571	0	0	0	0	0	0	nr	1.63	nr	7.46667	67.56	0	7.48
Alerce Andino	15	0.142857	0	0	0.0714286	0.214286	0	0	0	0	0	0	nr	0.534	nr	25.7567	152	0	0
Alerce Andino	16	0	0	0	0.857143	0.857143	0	0	0	0	0	0	nr	0.897	nr	16.7267	0	0	0
Alerce Andino	17	0	0	0	0	0	0	0	0	0	0	0	nr	0.984	nr	24.8067	9.4	0	0
Alerce Andino	18	0	0	0	0.153846	0.153846	0	0	0	0	0	0	nr	0.297	nr	28.035	7.92	0	0
Alerce Andino	19	0	0	0	0	0	0	0	0	0	0	0	nr	0	nr	16.756	2.48	0	0
Alerce Andino	20	0	0	0	0.25	0.25	0	0	0	0	0	0	nr	0.909	nr	28.1967	15.8	89.52	0
Cardenal Samoré	1	0	0	0	0	0	0	0	0	0	0	0	nr	33.562	nr	45.1	50.64	0	0
Cardenal Samoré	2	0	0	0	0	0	0	0	0	0	0	0	nr	34.757	nr	29.402	9.92	0	0
Cardenal Samoré	3	0	0	0	0	0	0	0	0	0	0	0	nr	32.292	nr	51.22	41.12	0	0
Cardenal Samoré	4	0	0	0	0	0	0	0	0	0	0	0	nr	34.517	nr	29.346	106.08	0	8.48
Cardenal Samoré	5	0	0	0	0	0	0	0	0	0	0	0	nr	35.369	nr	35.556	200.96	0	0
Cardenal Samoré	6	0	0	0	0	0	0	0	0	0	0	0	nr	42.061	nr	50.91	0	0	0
Cardenal Samoré	7	0	0	0	0	0	0	0	0	0	0	0	nr	58.901	nr	76.554	20.16	0	40.96
Cardenal Samoré	8	0	0	0	0	0	0	0	0	0	0	0	nr	45.99	nr	56.4625	125.4	0	10.64
Cardenal Samoré	9	0	0	0	0	0	0	0	0	0	0	0	nr	54.634	nr	41.118	28.88	12.16	0
Cardenal Samoré	10	0	0	0	0	0	0	0	0	0	0	0	nr	35.882	nr	57.234	0	0	0
Cardenal Samoré	11	0	0	0	0	0	0	0	0	0	0	0	nr	31.676	nr	31.187	0	0	11
Cardenal Samoré	12	0	0	0	0	0	0	0	0	0	0	0	nr	29.466	nr	35.588	0	0	0
Cardenal Samoré	13	0	0	0	0	0	0	0	0	0	0	0	nr	52.053	nr	49.2125	15.08	45.92	0
Cardenal Samoré	14	0	0	0	0	0	0	0	0	0	0	0	nr	35.684	nr	38.364	40.64	11	12.6
Cardenal Samoré	15	0	0	0	0	0	0	0	0	0	0	0	nr	47.733	nr	63.202	11.52	160.8	0
Cardenal Samoré	16	0	0	0	0	0	0	0	0	0	0	10	0	28.861	nr	45.7	0	0	0
Cardenal Samoré	17	0	0	0	0	0	0	0	0	0	0	0	nr	41.345	nr	63.59	42.08	10.52	0
Cardenal Samoré	18	0.0588235	0	0	0	0.0588235	0	0	0	0	0	0	nr	37.708	nr	53.298	50.16	0	0
Cardenal Samoré	19	0	0	0	0	0	0	0	0	0	0	0	nr	27.904	nr	38.636	128.32	7.64	0
Cardenal Samoré	20	0	0	0	0	0	0	0	0	0	0	0	nr	27.636	nr	52.064	0	11.16	0
Chacao	1	0	0	0	0	0	0	0	0	0	0	90	1.74889	1.8	11.29	17.885	0	0	22.88
Chacao	2	0	0	0	0	0	0	0	0	0	0	40	2.6725	4.47	8.09	15.005	0	26.96	0
Chacao	3	0	0	0	0	0	0	0	0.133333	0	0.133333	60	0.89	4.78	0	28.1775	10.08	182.25	10.96
Chacao	4	0	0	0	0	0	0	0	0.117647	0	0.117647	30	2.49	6.916	0	24.0033	0	0	45.625
Chacao	5	0	0	0	0	0	0	0	0.222222	0	0.222222	50	0.112	7.32	5.78333	22.34	0	0
Chacao	6	0	0	0	0	0	0	0	0	0	0	90	1.54	2.32	nr	17.8333	0	144.16	0
Chacao	7	0	0	0	0	0	0	0	0	0	0	80	0.1325	4.485	0.2425	31.07	0	0	18
Chacao	8	0	0.285714	0	0	0.285714	0	0	0	0	0	30	1.546	3.46	0	27.0933	0	36.08	0
Chacao	9	0	0	0	0	0	0	0	0	0	0	30	4.05	4.106	nr	17.718	0	42.64	0
Chacao	10	0	0	0	0.166667	0.166667	0	0	0	0	0	40	2.0975	6.225	5.04333	18.63	45.68	0	0
Chacao	11	0	0	0	0	0	0	0	0	0	0	100	1.087	nr	7.62	nr	0	0	0
Chacao	12	0	0	0	0	0	0	0	0	0	0	90	0.996667	0	0.85	32.1067	105.72	0	0
Chacao	13	0	0	0	0	0	0	0	0.0769231	0.153846	0.230769	60	0	1.094	2.3425	49.66	0	0	0
Chacao	14	0	0	0	0	0	0	0	0	0	0	40	4.2925	9.94833	13.8775	36.36	0	0	0
Chacao	15	0	0	0	0	0	0	0	0	0	0	40	0	7.665	nr	26.5075	0	0	34.48
Chacao	16	0	0	0	0	0	0	0	0	0	0	80	1.00125	12.05	13.1833	22.065	0	0
Chacao	17	0	0	0	0	0	0	0	0	0	0	70	1.56428	15.41	15.106	nr	0	0	0
Chacao	18	0	0	0	0	0	0	0	0.0833333	0	0.0833333	20	5.73	5.105	3.585	37.17		0	0
Chacao	19	0	0	0	0	0	0	0	0	0	0	20	0	20.665	1.965	43.4267
Chacao	20	0	0	0	0	0	0	0	0	0	0	30	0.67	3.0928	10.77	14.82
Chaitén	1	0	0.0714286	0	0	0.0714286	0	0	0	0	0	0	nr	9.975	nr	11.448		0
Chaitén	2	0	0	0	0	0	0	0	0	0	0	0	nr	10.255	nr	17.374	0	0	0
Chaitén	3	0	0	0	0	0	0	0	0	0	0	0	nr	15.347	nr	15.128	0	0	87.625
Chaitén	4	0	0	0	0	0	0	0	0	0	0	0	nr	10.142	nr	12.326	0	0	0
Chaitén	5	0	0	0	0	0	0	0	0	0	0	0	nr	13.73	nr	8.984	0	0	0
Chaitén	6	0	0	0	0	0	0	0	0	0	0	0	nr	24.377	nr	15.072	77.875	0	0
Chaitén	7	0	0	0	0	0	0	0	0	0	0	0	nr	14.447	nr	39.038	0	0	0
Chaitén	8	0	0	0	0	0	0	0	0	0	0	0	nr	16.26	nr	25.492	0	0
Chaitén	9	0	0	0	0	0	0	0	0	0	0	20	9.24	22.634	nr	32.22	53.2	0	0
Chaitén	10	0	0	0	0	0	0	0	0	0	0	10	8.87	16.89	0	22.6133	0	34.8889	0
Chaitén	11	0	0	0	0	0	0	0	0	0	0	0	nr	18.474	nr	16.26	0	0	0
Chaitén	12	0	0	0	0	0	0	0	0	0	0	0	nr	24.496	nr	27.456	0	0	0
Chaitén	13	0	0	0	0	0	0	0	0	0	0	0	nr	11.136	nr	13.462	0	0	0
Chaitén	14	0	0	0.466667	0	0.466667	0	0	0	0	0	0	nr	14.048	nr	35.208	0	0	0
Chaitén	15	0	0	0	0	0	0	0	0	0	0	0	nr	15.94	nr	26.094	0	0	0
Chaitén	16	0	0	0	0	0	0	0	0	0	0	0	nr	22.671	nr	19.62	0	0	0
Chaitén	17	0	0.0238095	0.0952381	0	0.119048	0	0	0	0	0	0	nr	14.825	nr	25.85	0	0	0
Chaitén	18	0	0	0.166667	0	0.166667	0	0	0	0	0	0	nr	20.894	nr	19.224	0	6.04	0
Chaitén	19	0	0	0.133333	0	0.133333	0	0	0	0	0	0	nr	13.743	nr	16.076	12.4	0	0
Chaitén	20	0	0	0	0	0	0	0	0	0	0	10	16.76	26.94	nr	18.892	0	0	7.4375
Contao	1	0	0	0	0	0	0	0	0	0	0	0	nr	0.065	nr	28.226	284.6	157.12	0
Contao	2	0	0	0	0	0	0	0	0	0	0	0	nr	0.429	nr	13.808	66.6	0	0
Contao	3	0	0	0	0	0	0	0	0	0	0	0	nr	0.389	nr	18.9	48.84	4.16	0
Contao	4	0	0	0	0	0	0	0	0	0	0	0	nr	0.723	nr	12.855	92.88	182.72	0
Contao	5	0	0	0	0	0	0	0	0	0	0	0	nr	0.213	nr	29.17	8.625	33.68	0
Contao	6	0	0	0	0	0	0	0	0	0	0	0	nr	1.963	nr	35.2	8.04	57.24	0
Contao	7	0	0	0	0	0	0	0	0	0	0	0	nr	2.035	nr	16.1867	61.7778	0	0
Contao	8	0	0	0	0	0	0	0	0	0	0	0	nr	1.975	nr	10.34	122.444	60.1875	0
Contao	9	0	0	0	0	0	0	0	0	0	0	0	nr	2.113	nr	31.28	121.92	7.36	0
Contao	10	0.0666667	0	0	0	0.0666667	0	0	0	0	0	0	nr	1.937	nr	nr	183	73.5
Contao	11	0	0	0	0	0	0	0	0	0	0	0	nr	3.236	nr	nr	21	0	0
Contao	12	0	0.333333	0	0	0.333333	0	0	0	0	0	0	nr	2.901	nr	nr	192.48	2	0
Contao	13	0	0.181818	0	0	0.181818	0	0	0	0	0	0	nr	3.245	nr	nr	191.84	0	0
Contao	14	0	0	0	0	0	0	0	0	0	0	0	nr	2.718	nr	nr	0	10.08	0
Contao	15	0	0	0	0	0	0	0	0	0	0	0	nr	1.77	nr	nr	0	10.56	0
Contao	16	0	0	0	0	0	0	0	0	0	0	0	nr	2.28111	nr	nr	0	2	0
Contao	17	0	0	0	0	0	0	0	0	0	0	0	nr	1.022	nr	nr	0	32.88	0
Contao	18	0.0588235	0	0	0	0.0588235	0	0	0	0	0	0	nr	1.636	nr	nr	28.8	38.52	0
Contao	19	0	0	0	0	0	0	0	0	0	0	0	nr	0.603	nr	nr	110.52	57.12	0
Contao	20	0.2	0	0	0	0.2	0	0	0	0	0	0	nr	2.90333	nr	nr	172.16	12.32	0
Cutipay	1	0	0	0	0	0	0	0	0.125	0	0.125	100	0	nr	0	nr	40.375	8.6875
Cutipay	2	0	0	0	0	0	0	0	0.555556	0	0.555556	90	0	nr	0.455	0	0	0
Cutipay	3	0	0	0	0	0	0	0	0.222222	0	0.222222	100	0	nr	4.115	nr	17.125	129.3	0
Cutipay	4	0	0	0	0	0	0	0	0.307692	0	0.307692	70	0	nr	0.306666	nr	0	136	3.16
Cutipay	5	0	0	0	0	0	0	0	0.857143	0	0.857143	100	0	5.28	4.44666	nr	0	0	0
Cutipay	6	0	0	0	0	0	0	0	0.625	0	0.625	100	0.049	nr	1.99666	nr	15.125	9.2	0
Cutipay	7	0	0	0	0	0	0	0	1	0	1	100	0	nr	6.124	nr	0	0	3.95
Cutipay	8	0	0	0	0	0	0	0	0.375	0	0.375	100	0.208	nr	6.72	nr	0	0	0
Cutipay	9	0	0	0	0.0588235	0.0588235	0	0	0.117647	0	0.117647	90	0	nr	2.495	2.14	105	44	25.375
Cutipay	10	0	0	0	0	0	0	0	0.111111	0	0.111111	90	0	nr	6.0475	nr	0	0	10.24
Cutipay	11	0	0	0	0	0	0	0	0.454545	0	0.454545	100	0.116	nr	0.12	nr	82.68	0	0
Cutipay	12	0	0	0	0	0	0	0	0.0714286	0	0.0714286	100	0	nr	8.05667	nr	0	75.6	70.92
Cutipay	13	0	0	0	0	0	0	0	0	0	0	70	0	1.785	2.786	nr	0	0	5.32
Cutipay	14	0	0	0	0	0	0	0	0.166667	0	0.166667	100	0	nr	5.44	nr	121.68	5.48	0
Cutipay	15	0	0	0	0	0	0	0	1.16667	0.166667	1.33333	100	0	nr	9.898	nr	42.48	0	0
Cutipay	16	0	0	0	0	0	0	0	0	0	0	100	0	nr	0.98	nr	0	0	0
Cutipay	17	0	0	0	0	0	0	0	0.1	0	0.1	100	0	nr	0	nr	9.92	8.04	11.52
Cutipay	18	0	0	0	0	0	0	0	0.0769231	0	0.0769231	100	0	nr	0	nr	103.125	15.7	13.9375
Cutipay	19	0	0	0	0	0	0	0	0.111111	0	0.111111	70	0	1.84	1.715	nr	265.28	57.12	55.8
Cutipay	20	0	0	0	0	0	0	0	0.111111	0	0.111111	100	0	nr	3.245	nr	58.32	0	66.625
Futaleufú	1	0	0	0	0	0	0	0	0.111111	0	0.111111	100	0	nr	0	20.05	0	0	0
Futaleufú	2	0	0	0	0	0	0	0	0.111111	0	0.111111	70	0	1.9333	0	6	100.2	0
Futaleufú	3	0	0	0	0	0	0	0	0	0	0	70	0	2.25	1.94	nr	106.08	0	0
Futaleufú	4	0	0.0714286	0	0	0.0714286	0	0	0.142857	0	0.142857	20	0	0	8.42	nr	0	0
Futaleufú	5	0	0	0	0	0	0	0	0	0	0	100	0	nr	11.17	0	46.24	0	0
Futaleufú	6	0	0	0	0	0	0	0	0	0	0	0	nr	1.062	nr	0	0	0	0
Futaleufú	7	0	0	0	0	0	0	0	0	0	0	0	nr	0.575	nr	12.01	94.08	0	0
Futaleufú	8	0.461538	0	0	0	0.461538	0	0	0	0	0	0	nr	0	nr	0	0		11.96
Futaleufú	9	0	0	0	0	0	0	0	0	0	0	40	0	0	nr	14.0633	0	0
Futaleufú	10	0.2	0	0	0	0.2	0	0	0	0	0	0	nr	0.829	0	11.53	0	0	0
Futaleufú	11	0	0	0	0	0	0	0	0	0	0	90	0.125	0	nr	5.646	94.08	0	0
Futaleufú	12	0	0	0	0	0	0	0	0	0	0	30	0	1.4842	13.4233	nr	0	0	0
Futaleufú	13	0	0	0	0	0	0	0	0	0	0	90	0	0	5.08	nr		0	0
Futaleufú	14	0	0	0	0	0	0	0	0.1875	0	0.1875	90	0	0	nr	14.056	0	0	0
Futaleufú	15	0	0	0	0	0	0	0	0.125	0	0.125	100	0.589	nr	4.58	8.8	0	0	0
Futaleufú	16	0	0	0	0	0	0	0	0	0	0	0	nr	2.873	1.21	0	0	0	0
Futaleufú	17	0	0	0	0	0	0	0	0	0	0	100	0	nr	13.9267	7.58	0	0
Futaleufú	18	0	0	0	0	0	0	0	0	0	0	20	0	0.349	3.986	nr	8.68	0	0
Futaleufú	19	0	0	0	0	0	0	0	0.153846	0	0.153846	80	0	0	6.83	10.0367	0	0	0
Futaleufú	20	0.0714286	0	0	0	0.0714286	0	0	0	0	0	60	0	0	nr	5.402	23.8889	0	11.875
Hornopirén	1	0	0	0	0	0	0	0	0	0	0	0	nr	3.419	nr	6.30667	123.84	70.875	0
Hornopirén	2	0	0	0	0	0	0	0	0	0	0	0	nr	1.374	nr	6.136	0	67.68	0
Hornopirén	3	0	0	0	0	0	0	0	0	0	0	0	nr	3.969	nr	3.566	0	64	0
Hornopirén	4	0	0	0	0	0	0	0	0	0	0	0	nr	7.271	nr	6.73	0	0	0
Hornopirén	5	0	0	0	0	0	0	0	0	0	0	0	nr	1.437	nr	0.92	0	0	0
Hornopirén	6	0	0	0	0	0	0	0	0	0	0	0	nr	1.649	nr	4.27	99.96	0	0
Hornopirén	7	0	0	0	0	0	0	0	0	0	0	0	nr	7.25	nr	2.53		0	0
Hornopirén	8	0	0	0	0	0	0	0	0	0	0	0	nr	2.33	nr	11.586	9.8	15.15	0
Hornopirén	9	0	0	0	0	0	0	0	0	0	0	0	nr	2.399	nr	11.9525	85.05	12.64	0
Hornopirén	10	0	0	0	0.0714286	0.0714286	0	0	0	0	0	0	nr	5.871	nr	10.05	164.85	9.64
Hornopirén	11	0	0	0	0	0	0	0	0	0	0	0	nr	4.732	nr	2.4125	0	0	0
Hornopirén	12	0	0	0	0	0	0	0	0	0	0	0	nr	1.635	nr	6.258	10.68
Hornopirén	13	0	0	0	0	0	0	0	0	0	0	0	nr	5.476	nr	5.668	0	17.1875	41
Hornopirén	14	0	0	0	0	0	0	0	0	0	0	0	nr	3.864	nr	8.784	6.56	10.0625
Hornopirén	15	0	0	0	0	0	0	0	0	0	0	0	nr	3.626	nr	13.705	0	121.28
Hornopirén	16	0	0	0	0	0	0	0	0	0	0	0	nr	9.624	nr	19.4125	50.25	0	0
Hornopirén	17	0	0	0	0	0	0	0	0	0	0	0	nr	3.436	nr	8.295	328.2	0	0
Hornopirén	18	0	0	0	0	0	0	0	0	0	0	0	nr	4.108	nr	13.898	1.64	12.68	0
Hornopirén	19	0	0	0	0	0	0	0	0	0	0	0	nr	3.172	nr	13.9	2.96	0	0
Hornopirén	20	0	0	0	0	0	0	0	0	0	0	0	nr	4.314	nr	0	79.32	0	0
Llanquihue	1	0	0	0	0	0	0	0.176471	0.176471	0	0.352941	100	0	nr	2.61	nr	0	10.32	0
Llanquihue	2	0	0	0	0	0	0	0.133333	0	0	0.133333	100	0	nr	7.586	nr	0	45.28	0
Llanquihue	3	0	0	0	0	0	0	0	0	0	0	100	0	nr	3.004	nr	48.36	14.04	0
Llanquihue	4	0	0	0	0	0	0	0	0.368421	0	0.368421	100	0	nr	11.966	nr	7.84	34.16	13.56
Llanquihue	5	0	0	0	0	0	0	0	0	0	0	100	0	nr	4.91	nr	5.4	35.84	0
Llanquihue	6	0	0	0	0	0	0	0	0	0	0	100	0	nr	0.324	nr	73.125	35.92	0
Llanquihue	7	0	0	0	0	0	0	0	0	0	0	90	0	0	5.74	3.7	7.4	6.12	0
Llanquihue	8	0	0	0	0	0	0	0	0.347826	0	0.347826	100	0	nr	6.795	24.11	11.88	140.25	0
Llanquihue	9	0	0	0	0	0	0	0	0	0	0	80	0	nr	0.935	10.72	84.24	37.12	0
Llanquihue	10	0	0	0	0	0	0	0	0.178571	0	0.178571	100	0	nr	5.115	nr	53.44	47.44	0
Llanquihue	11	0	0.0294118	0	0	0.0294118	0	0	0.676471	0	0.676471	100	0	nr	0.64	nr	0	32.24	0
Llanquihue	12	0	0	0.08	0	0.08	0	0	0.08	0	0.08	80	0	nr	8.0475	0	55.68	188.48	0
Llanquihue	13	0	0	0	0	0	0	0	0.25	0	0.25	100	0	nr	4.795	7.06	0	0	0
Llanquihue	14	0	0	0	0	0	0	0	0.758621	0	0.758621	100	0	nr	4.285	nr	11.12	3.24	0
Llanquihue	15	0	0	0	0	0	0	0	0.24	0	0.24	100	0.1	nr	2.22	nr	16.0625	88.32	11.08
Llanquihue	16	0	0	0	0	0	0	0	0.405405	0	0.405405	100	0	nr	0.764	nr	12.36	7.4375	28.8889
Llanquihue	17	0	0	0	0	0	0	0	0.1	0	0.1	100	0	nr	0.98	nr	29.36	12	0
Llanquihue	18	0	0	0	0	0	0	0	0.0909091	0	0.0909091	100	0	nr	1.3225	nr	187.04	0	96.6
Llanquihue	19	0	0	0	0	0	0	0	0.116279	0	0.116279	100	0	nr	2.07	nr	105.24	93.6	87.48
Llanquihue	20	0	0	0	0	0	0	0	0.107143	0	0.107143	90	0	0.856	8.44	nr	9.2	25.44	94.56
Los Hualles	1	0	0	0	0	0	0	0	0	0	0	0	nr	1.332	nr	8.72	105	310.8	0
Los Hualles	2	0	0	0	0	0	0	0	0	0	0	0	nr	0.606	nr	6.04333	193.6	241	0
Los Hualles	3	0	0	0.25	0	0.25	0	0	0	0	0	0	nr	0.759	nr	20.3425	272	302
Los Hualles	4	0	0	0	0	0	0	0	0	0	0	0	nr	0.336	nr	7.59	275	133.92
Los Hualles	5	0	0.0769231	0	0	0.0769231	0	0	0	0	0	0	nr	0.607	nr	15.428	304	71.28
Los Hualles	6	0	0	0	0	0	0	0	0	0	0	0	nr	2.834	nr	11.143	178.88	165.6
Los Hualles	7	0	0	0	0	0	0	0	0	0	0	0	nr	0	nr	13.664	130.08	61.8
Los Hualles	8	0	0	0	0	0	0	0	0	0	0	0	nr	0.63	nr	4.50333	95.4	227.2	0
Los Hualles	9	0	0	0	0	0	0	0	0	0	0	0	nr	2.254	nr	7.5075	27.52	218	25.28
Los Hualles	10	0	0	0	0	0	0	0	0	0	0	0	nr	2.77	nr	10.24	0	89.04	105.36
Los Hualles	11	0	0	0	0	0	0	0	0	0	0	0	nr	2.03111	nr	14.062	95.16	204.32	196.5
Los Hualles	12	0	0.0833333	0	0	0.0833333	0	0	0	0	0	0	nr	0	nr	13.246	0	177.4	0
Los Hualles	13	0	0	0	0	0	0	0	0	0	0	0	nr	0.837	nr	6.662	120.32	94.32	12.04
Los Hualles	14	0	0	0	0	0	0	0	0	0	0	0	nr	0.739	nr	5.84	31.68	33.12	14.48
Los Hualles	15	0	0	0	0	0	0	0	0	0	0	0	nr	0.562	nr	3.635	25.68	148	11.04
Los Hualles	16	0	0	0	0	0	0	0.210526	0.105263	0	0.315789	70	0.272	2.98	2.63	5.00667	148.96	137.76	0
Los Hualles	17	0	0	0	0	0	0	0.259259	0.0740741	0	0.333333	100	0	nr	0	0	72.84	148.32	8.76
Los Hualles	18	0	0	0	0	0	0	0	0	0	0	40	0.7275	1.117	0	6.74	89.04	230.25	0
Los Hualles	19	0	0	0	0	0	0	0	0	0	0	20	0	0.9825	0.965	8.06	73.08	64.5	0
Los Hualles	20	0	0	0	0	0	0	0	0	0	0	0	nr	0.415	nr	9.92	152.16	206.2	11.76
Los Muermos	1	0	0.0909091	0	0	0.0909091	0	0	0	0	0	0	nr	3.254	nr	11.8775	39.76	51.2	52.4
Los Muermos	2	0	0	0	0	0	0	0	0	0	0	0	nr	1.966	nr	17.784	51.44	59.28
Los Muermos	3	0	0	0	0	0	0	0	0	0	0	0	nr	0.741	nr	12.638	0	11.72	0
Los Muermos	4	0	0	0	0	0	0	0	0	0	0	0	nr	1.597	nr	3.72	11.4375	8.56	11.6
Los Muermos	5	0	0	0	0	0	0	0	0	0	0	0	nr	1.562	nr	8.16	106.32	76.44	43.84
Los Muermos	6	0	0	0	0	0	0	0	0	0	0	0	nr	0.698	nr	7.184	40.48	50.64	93.48
Los Muermos	7	0	0.0714286	0	0	0.0714286	0	0	0	0	0	0	nr	2.748	nr	13.315	64.8	66.36	0
Los Muermos	8	0	0	0	0	0	0	0	0	0	0	0	nr	1.034	nr	3.988	63.96	74.4	29.84
Los Muermos	9	0	0	0	0	0	0	0	0	0	0	0	nr	1.134	nr	12.584	15.875	0	0
Los Muermos	10	0	0.454545	0	0	0.454545	0	0	0	0	0	0	nr	1.148	nr	17.075	8.88	51.4	3.76
Los Muermos	11	0	0	0	0	0	0	0	0	0	0	0	nr	0	nr	9.9825	210.56	207.04	42.24
Los Muermos	12	0	0	0	0	0	0	0	0	0	0	0	nr	0	nr	2.8725	35.84	13.28	15.35
Los Muermos	13	0	0.0714286	0	0	0.0714286	0	0	0	0	0	0	nr	5.406	nr	2.6275		259.667	293
Los Muermos	14	0	0	0	0	0	0	0	0	0	0	0	nr	0.527	nr	0	33.76	287.8	4.52
Los Muermos	15	0	0.166667	0	0	0.166667	0	0	0	0	0	0	nr	0.396	nr	4.39	127.2	167.84	0
Los Muermos	16	0	0	0	0	0	0	0	0	0	0	0	nr	0.709	nr	2.045	18.4667	86.4	0
Los Muermos	17	0	0.166667	0	0	0.166667	0	0	0	0	0	0	nr	0	nr	0	112.44	12.96	11.5
Los Muermos	18	0	0	0	0	0	0	0	0	0	0	0	nr	0	nr	0	10.68	69.625	0
Los Muermos	19	0	0	0	0	0	0	0	0	0	0	0	nr	0	nr	0	50.88	51.375	0
Los Muermos	20	0	0	0	0	0	0	0	0	0	0	0	nr	0	nr	4.23	0	45.44	0
Los Venados	1	0	0	0	0.037037	0.037037	0	0	0	0	0	0	nr	8.42	nr	32.688	184.16	0	0
Los Venados	2	0	0	0	0	0	0	0	0	0	0	0	nr	21.016	nr	47.088	68	5.56	0
Los Venados	3	0	0	0	0.0555556	0.0555556	0	0	0	0	0	0	nr	6.082	nr	2.854	53.84	69.28	0
Los Venados	4	0	0	0	0	0	0	0	0	0	0	0	nr	9.088	nr	nr	0	0	0
Los Venados	5	0.04	0	0	0	0.04	0	0	0	0	0	0	nr	9.153	nr	16.32	91		0
Los Venados	6	0	0	0	0	0	0	0	0	0	0	0	nr	9.625	nr	29.89	129.24	188.8	0
Los Venados	7	0	0	0	0	0	0	0	0	0	0	0	nr	7.155	nr	36.2225	202.88	3.8	0
Los Venados	8	0	0	0	0	0	0	0	0	0	0	0	nr	17.396	nr	27.214	134.72	9.68	0
Los Venados	9	0	0	0	0	0	0	0	0	0	0	0	nr	6.454	nr	26.134	0	8.2	0
Los Venados	10	0	0	0	0	0	0	0	0	0	0	0	nr	3.344	nr	25.295	109.68	103.08	0
Los Venados	11	0	0	0	0.0666667	0.0666667	0	0	0	0	0	0	nr	5.508	nr	6.28	275.2	27.04	6
Los Venados	12	0	0	0	0	0	0	0	0	0	0	0	nr	6.59	nr	32.67	60.16	109.2	0
Los Venados	13	0	0	0	0	0	0	0	0	0	0	0	nr	11.73	nr	33.42	0	114	0
Los Venados	14	0	0	0.2	0	0.2	0	0	0	0	0	0	nr	7.797	nr	13.4133	159.84	4.8	0
Los Venados	15	0	0	0	0	0	0	0	0	0	0	0	nr	13.194	nr	35.454	140.8	16.52	0
Los Venados	16	0	0	0	0	0	0	0	0	0	0	0	nr	11.883	nr	18.87	9.8	30.5556	0
Los Venados	17	0	0	0	0	0	0	0	0	0	0	0	nr	13.954	nr	12.9033	0	0	0
Los Venados	18	0	0	0	0	0	0	0	0	0	0	0	nr	4.93	nr	21.302	15.2222	172	0
Los Venados	19	0	0	0	0	0	0	0	0	0	0	0	nr	8.05	nr	36.945	0	118.68	0
Los Venados	20	0	0	0	0	0	0	0	0	0	0	0	nr	12.363	nr	17.126	39.92	179.778	0
Nercón	1	0	0	0	0	0	0	0	0	0	0	10	19.76	6.79	nr	17.78	39.6	0
Nercón	2	0	0	0	0	0	0	0	0	0	0	20	11.82	28.671	nr	19.834	0	96	0
Nercón	3	0	0	0	0	0	0	0	0	0	0	10	10.9	17.2033	8.495	14.3167			0
Nercón	4	0	0	0	0	0	0	0	0	0	0	50	5.626	19.922	nr	25.7475	0	29	0
Nercón	5	0	0	0	0	0	0	0	0	0	0	0	nr	13.355	nr	0		0
Nercón	6	0	0	0	0	0	0	0	0	0	0	0	nr	5.795	nr	9.12	0	0	211
Nercón	7	0	0	0	0	0	0	0	0	0	0	0	nr	17.231	nr	22.468	0	0	0
Nercón	8	0	0	0	0	0	0	0	0	0	0	30	0	1.8557	nr	4.285	110.88	0	0
Nercón	9	0	0	0	0	0	0	0	0	0	0	10	5.05	2.35667	nr	16.9775	61.8	38.96	0
Nercón	10	0	0	0	0	0	0	0	0	0	0	20	0	5.08625	nr	6.17	8.92	147.04	0
Nercón	11	0	0	0	0	0	0	0	0	0	0	10	3.41	4.07222	nr	20.124	50	44.64	0
Nercón	12	0	0	0	0	0	0	0	0	0	0	0	nr	20.534	nr	43.16	0	81.6	0
Nercón	13	0	0	0	0	0	0	0	0	0	0	0	nr	2.429	nr	3.11	0	14.9375	0
Nercón	14	0	0	0	0	0	0	0	0	0	0	10	6.99	14.1022	nr	30.48	10.32	35.28	0
Nercón	15	0	0	0	0	0	0	0	0	0	0	40	13.5225	4.85833	6.5875	9.42	45.68	63	22.8
Nercón	16	0	0	0	0	0	0	0	0	0	0	20	3.62	16.6925	nr	35.046	110.222	0	0
Nercón	17	0	0	0	0	0	0	0	0	0	0	0	nr	14.421	nr	32.5967	0	0
Nercón	18	0	0	0	0	0	0	0	0	0	0	10	0	8.81222	4.575	2.59	0	7.16	0
Nercón	19	0.133333	0	0	0	0.133333	0	0	0	0	0	50	2.686	5.858	nr	nr	0	0
Nercón	20	0.259259	0	0	0	0.259259	0	0	0	0	0	0	nr	17.443	nr	nr
Puente Dumontt	1	0	0.533333	0	0	0.533333	0	0	0	0	0	0	nr	0.17	0	0	0	58.8	0
Puente Dumontt	2	0	0	0	0	0	0	0	0	0	0	0	nr	0.792	nr	8.444	0	4.55556	0
Puente Dumontt	3	0	0	0	0	0	0	0	0	0	0	0	nr	0.608	nr	0	165.375	15.7778	0
Puente Dumontt	4	0.0909091	0.363636	0	0	0.454545	0	0	0	0	0	0	nr	1.883	nr	11.4375	0	160.25	0
Puente Dumontt	5	0	0	0	0	0	0	0	0	0	0	0	nr	3.439	nr	12.3325	0	45.25	0
Puente Dumontt	6	0	0	0	0	0	0	0	0	0	0	0	nr	2.093	nr	11.916	0	49.5	0
Puente Dumontt	7	0	0	0	0	0	0	0	0	0	0	0	nr	0.259	nr	5.55	0	94.6875	0
Puente Dumontt	8	0.454545	0	0	0	0.454545	0	0	0	0	0	0	nr	0.194	nr	10.8233	0	143.438	0
Puente Dumontt	9	0	0	0	0	0	0	0	0	0	0	0	nr	0	nr	6.5	0	153.12	0
Puente Dumontt	10	0	0	0	0	0	0	0	0	0	0	0	nr	0.705	nr	7.65	11.12	152	0
Puente Dumontt	11	0	0	0	0	0	0	0	0	0	0	0	nr	0.353	nr	14.986	0	172.75	0
Puente Dumontt	12	0	0	0	0	0	0	0	0	0	0	0	nr	0.35	nr	8.42	0		0
Puente Dumontt	13	0	0.111111	0	0	0.111111	0	0	0	0	0	0	nr	2.123	nr	5.845	0	0	0
Puente Dumontt	14	0	0.285714	0	0	0.285714	0	0	0	0	0	0	nr	0.192	nr	1.675	0	0	0
Puente Dumontt	15	0	0	0	0	0	0	0	0	0	0	0	nr	0.177	nr	6.33	0	0	0
Puente Dumontt	16	0	0.111111	0	0	0.111111	0	0	0	0	0	0	nr	0.96	nr	6.442	0	0	0
Puente Dumontt	17	0	0	0	0	0	0	0	0	0	0	0	nr	0.607	nr	5.52667	0		0
Puente Dumontt	18	0	0.04	0	0	0.04	0	0	0	0	0	0	nr	0.155	nr	12.675	9.4	51.96	0
Puente Dumontt	19	0	0	0	0	0	0	0	0	0	0	0	nr	0.747	nr	4.3	0	29.9	0
Puente Dumontt	20	0	0	0	0	0	0	0	0	0	0	0	nr	0.392	nr	1.5	0	228.5
Puerto Cardenas	1	0	0	0	0	0	0	0	0	0	0	0	nr	0.527	nr	15.912	0	0
Puerto Cardenas	2	0	0	0.181818	0	0.181818	0	0	0	0	0	0	nr	1.282	nr	11.108	49.52	21.6	0
Puerto Cardenas	3	0	0.0833333	0	0	0.0833333	0	0	0	0	0	0	nr	1.503	nr	27.49	9.32	151.2	0
Puerto Cardenas	4	0	0	0	0	0	0	0	0	0	0	0	nr	0.44	nr	16.27	0	14.08	0
Puerto Cardenas	5	0	0.125	0	0	0.125	0	0	0	0	0	0	nr	1.319	nr	7.174	0	89.125	0
Puerto Cardenas	6	0	0.0555556	0.222222	0	0.277778	0	0	0	0	0	0	nr	2.542	nr	4.16666	0	4	0
Puerto Cardenas	7	0	0	0	0	0	0	0	0	0	0	0	nr	0.671	nr	8.762	29.12	0	0
Puerto Cardenas	8	0	0	0	0	0	0	0	0	0	0	0	nr	0.29	nr	8.368	0	0	0
Puerto Cardenas	9	0	0	0	0	0	0	0	0	0	0	0	nr	0.086	nr	11.234	6.04	15.25	0
Puerto Cardenas	10	0	0	0	0	0	0	0	0	0	0	0	nr	1.164	nr	3.032	12.8	0	0
Puerto Cardenas	11	0	0.1	0	0	0.1	0	0	0	0	0	0	nr	0	nr	0.683333	73.875	50.48	0
Puerto Cardenas	12	0.0555556	0.111111	0	0	0.166667	0	0	0	0	0	0	nr	0.552	nr	4.98	67.7778	9.24	0
Puerto Cardenas	13	0	0	0	0	0	0	0	0	0	0	0	nr	2.373	nr	8.4225	0	7.52	0
Puerto Cardenas	14	0	0	0	0	0	0	0	0	0	0	0	nr	0.971	nr	10.476	0	224.75	0
Puerto Cardenas	15	0	0.2	0	0	0.2	0	0	0	0	0	0	nr	1.021	nr	6.924	0	131.64	0
Puerto Cardenas	16	0	0.1875	0	0	0.1875	0	0	0	0	0	0	nr	2.205	nr	8.222	21.8889	0
Puerto Cardenas	17	0	0	0	0	0	0	0	0	0	0	0	nr	0.656	nr	18.406	0	0	0
Puerto Cardenas	18	0	0	0	0	0	0	0	0	0	0	0	nr	2.223	nr	7.962	0	0	0
Puerto Cardenas	19	0	0	0	0	0	0	0	0	0	0	0	nr	2.043	nr	4.772	4.3125	0	0
Puerto Cardenas	20	0	0	0	0	0	0	0	0	0	0	0	nr	0.304	nr	5.704	0	0	0
Puerto Fuy	1	0	0.3125	0	0	0.3125	0	0	0.03125	0	0.03125	0	nr	2.117	0	17.6575	11.04	28.4	0
Puerto Fuy	2	0	0.157895	0	0	0.157895	0	0	0.0526316	0	0.0526316	10	7.74	1.83889	nr	7.5	0	0
Puerto Fuy	3	0	0	0.142857	0	0.142857	0	0	0	0	0	20	0	5.195	2.525	15.95	18.96	7.48	0
Puerto Fuy	4	0	0	0	0.0833333	0.0833333	0	0	0	0	0	0	nr	1.54	nr	21.694	0	0	0
Puerto Fuy	5	0	0	0	0	0	0	0	0.176471	0	0.176471	60	0	5.1375	0	15.455	9.28	0	7.24
Puerto Fuy	6	0	0	0	0	0	0	0	0	0	0	0	nr	3.558	nr	18.315	327	10.8	0
Puerto Fuy	7	0	0	0	0	0	0	0	0.2	0	0.2	30	0	4.305	14.4733	15.88	217.4	7.76	11.04
Puerto Fuy	8	0	0	0	0	0	0	0	0	0	0	0	nr	0.985	nr	6.466	251.36	10.36	0
Puerto Fuy	9	0	0	0	0	0	0	0	0	0	0	0	nr	3.932	nr	7.948	94.2	0	104.52
Puerto Fuy	10	0.214286	0.0714286	0	0	0.285714	0	0	0	0	0	0	nr	1.665	nr	21.714	2.36	87	0
Puerto Fuy	11	0	0	0	0	0	0	0	0	0	0	0	nr	2.893	0	12.2525	191.2	11.92	0
Puerto Fuy	12	0	0.125	0	0	0.125	0	0	0	0	0	0	nr	8.176	nr	16.49	19.68	50.64	0
Puerto Fuy	13	0	0	0	0	0	0	0	0.0740741	0	0.0740741	0	nr	5.574	nr	18.346	47.28	0	10.2
Puerto Fuy	14	0	0.0588235	0	0	0.0588235	0	0	0	0	0	0	nr	2.198	nr	32.396	0	0	0
Puerto Fuy	15	0	0	0	0	0	0	0	0	0	0	0	nr	5.694	nr	19.336	0	7.76	0
Puerto Fuy	16	0	0	0	0	0	0	0	0	0	0	0	nr	4.275	nr	4.028	194.08	44.28	7.88
Puerto Fuy	17	0	0	0	0	0	0	0	0	0	0	0	nr	0.903	nr	19.006	41.2	170.24	0
Puerto Fuy	18	0	0	0	0	0	0	0	0	0	0	0	nr	4.758	nr	2.66	0	0	0
Puerto Fuy	19	0.0769231	0	0	0	0.0769231	0	0	0	0	0	0	nr	2.774	nr	21.49	12.52	14.72	14.76
Puerto Fuy	20	0.170732	0	0	0	0.170732	0	0	0	0	0	0	nr	4.319	nr	17.784	284.2	51.44	13.92
Puerto Octay	1	0	0	0	0	0	0	0	0	0	0	0	nr	2.322	nr	11.446	245	100.08	0
Puerto Octay	2	0	0	0	0	0	0	0	0	0	0	0	nr	5.177	nr	20.94	11	292	0
Puerto Octay	3	0	0	0	0.444444	0.444444	0	0	0	0	0	0	nr	4.841	nr	15.9275	299.75	182.812	0
Puerto Octay	4	0	0	0	0	0	0	0	0	0	0	0	nr	5.935	nr	14.23	12.2	149.812	0
Puerto Octay	5	0	0	0	0	0	0	0	0	0	0	0	nr	3.772	nr	24.26	6.28	191.2	14.52
Puerto Octay	6	0	0	0	0	0	0	0	0	0	0	0	nr	1.27	nr	14.1733	14.0625	65.64	178.72
Puerto Octay	7	0	0	0	0	0	0	0	0	0	0	0	nr	12.25	nr	8.468	286.2	180.8	23.3333
Puerto Octay	8	0	0	0	0	0	0	0	0	0	0	0	nr	8.406	nr	16.69	68.76	108.375	38.4
Puerto Octay	9	0	0	0	0	0	0	0	0	0	0	0	nr	8.843	nr	13.798	0	114.938	0
Puerto Octay	10	0	0	0	0	0	0	0	0	0	0	0	nr	5.651	nr	11.142	22.5556	193.76	6.48
Puerto Octay	11	0	0	0	0	0	0	0	0	0	0	0	nr	7.587	nr	12.99	20.4	102.72	0
Puerto Octay	12	0	0	0	0.0769231	0.0769231	0	0	0	0	0	0	nr	1.989	nr	13.328	0	35.68	50.875
Puerto Octay	13	0	0	0	0	0	0	0	0	0	0	0	nr	7.133	nr	8.205	59.16	81.36	11.2
Puerto Octay	14	0	0	0	0	0	0	0	0	0	0	0	nr	13.3	nr	4.65	0	16.5	0
Puerto Octay	15	0	0	0	0	0	0	0	0	0	0	0	nr	13.726	nr	8.6075	48.96	166.56	8.0625
Puerto Octay	16	0	0	0	0	0	0	0	0	0	0	0	nr	4.42	nr	10.81	54.84	52.56	3.92
Puerto Octay	17	0	0	0	0	0	0	0	0	0	0	0	nr	8.115	nr	17.542	26.64	8.44	16.6875
Puerto Octay	18	0	0	0	0.333333	0.333333	0	0	0	0	0	0	nr	7.699	nr	7.25	61.56	49.6	291
Puerto Octay	19	0	0.1	0	0.1	0.2	0	0	0	0	0	0	nr	6.685	nr	12.7275	128.76	21.24
Puerto Octay	20	0	0.230769	0	0	0.230769	0	0	0	0	0	0	nr	2.177	nr	19.49	17.2	17.44	25.125
Puntra	1	0	0	0	0	0	0	0	0	0	0	10	0	3.29667	nr	7.795	0	289	0
Puntra	2	0	0	0	0	0	0	0	0	0	0	10	0	1.03777	0	0	0	0	0
Puntra	3	0	0	0	0	0	0	0	0	0	0	0	nr	1.251	nr	22.24	43.92	4.48
Puntra	4	0	0	0	0	0	0	0	0	0	0	0	nr	6.42222	nr	17.554	0	0	0
Puntra	5	0	0	0	0	0	0	0	0	0	0	0	nr	7.20444	nr	9.372	95.16	33.36	0
Puntra	6	0	0.0714286	0	0	0.0714286	0	0	0	0	0	0	nr	3.151	nr	18.6233	0	0	9.16
Puntra	7	0	0	0	0	0	0	0	0	0	0	0	nr	1.61778	nr	10.94	0	6.96	0
Puntra	8	0	0	0	0	0	0	0	0	0	0	10	0	2.52875	nr	9.395	0	0	0
Puntra	9	0	0	0	0	0	0	0	0	0	0	0	nr	5.494	nr	11.502	0	24.3333	0
Puntra	10	0	0	0	0	0	0	0	0	0	0	0	nr	2.13888	nr	11.045	35.92	22.24	0
Puntra	11	0	0	0	0	0	0	0	0	0	0	10	0	5.105	5.305	7.33		155.812	0
Puntra	12	0	0	0	0	0	0	0	0	0	0	10	3.04	0.2925	nr	nr	53.84	10	0
Puntra	13	0	0	0	0	0	0	0	0	0	0	0	nr	6.92	nr	21.38	8.16	0	0
Puntra	14	0	0	0	0	0	0	0	0	0	0	0	nr	6.529	nr	19.02	0	10.16	11.76
Puntra	15	0	0	0	0	0	0	0	0	0	0	0	nr	2.712	nr	17.01	41.12	0	0
Puntra	16	0	0.4	0	0	0.4	0	0	0	0	0	10	0	1.52333	nr	16.874	42	0	0
Puntra	17	0	0	0	0	0	0	0	0	0	0	20	0	2.965	nr	20.2967	0	47.84	0
Puntra	18	0	0	0	0	0	0	0	0	0	0	0	nr	5.833	nr	17.96	0	0	0
Puntra	19	0	0	0	0	0	0	0	0	0	0	0	nr	4.999	nr	18.0433	0	0	0
Puntra	20	0	0	0	0	0	0	0	0	0	0	0	nr	4.6785	nr	1.375	99.84	0	0
Puyehue	1	0	0	0	0	0	0	0	0	0	0	0	nr	9.984	nr	11.6533	163.52	200.96	17.2
Puyehue	2	0	0	0	0	0	0	0	0	0	0	0	nr	26.093	nr	23.32	23.52	0	0
Puyehue	3	0	0	0	0	0	0	0	0	0	0	10	0	20.333	nr	18.5075	0	15.64	15.44
Puyehue	4	0	0	0	0.047619	0.047619	0	0	0	0	0	0	nr	8.117	nr	21.454	159.52	0	0
Puyehue	5	0	0	0	0.0588235	0.0588235	0	0	0	0	0	0	nr	11.143	nr	22.195	17.6	11.64	10.84
Puyehue	6	0	0	0	0.208333	0.208333	0	0	0	0	0	0	nr	8.096	nr	12.718	33.28	0	0
Puyehue	7	0.15	0	0	0	0.15	0	0	0	0	0	0	nr	7.25	nr	20.91	52.32	40.8	10.52
Puyehue	8	0	0	0	0	0	0	0	0	0	0	0	nr	4.753	nr	16.3	73.2	0	0
Puyehue	9	0	0	0	0.111111	0.111111	0	0	0	0	0	0	nr	6.942	nr	21.7025	192.8	0	0
Puyehue	10	0	0	0	0	0	0	0	0	0	0	0	nr	26.106	nr	29.34	48.4	0	0
Puyehue	11	0	0	0	0.181818	0.181818	0	0	0	0	0	0	nr	16.506	nr	53.595	0	5.8	10.8
Puyehue	12	0	0	0	0	0	0	0	0	0	0	0	nr	7.834	nr	13.092	12.68	0	0
Puyehue	13	0	0	0	0	0	0	0	0	0	0	0	nr	9.3025	nr	18.36	7.52	0	0
Puyehue	14	0	0	0	0	0	0	0	0	0	0	0	nr	4.65	nr	7.61667	23.68	0	0
Puyehue	15	0	0	0	0	0	0	0	0	0	0	0	nr	6.467	nr	14.92	0	5.64	0
Puyehue	16	0	0	0	0	0	0	0	0	0	0	0	nr	3.279	nr	10.92	29.92	10.56	0
Puyehue	17	0.428571	0	0	0	0.428571	0	0	0	0	0	0	nr	5.858	nr	13.0967	71.52	0	0
Puyehue	18	0	0	0	0	0	0	0	0	0	0	0	nr	9.64	nr	13.5133	8.36	0	0
Puyehue	19	0	0	0	0	0	0	0	0	0	0	0	nr	16.172	nr	20.968	0	56.24	105.96
Puyehue	20	0	0	0	0	0	0	0	0	0	0	0	nr	11.901	nr	32.348	130.2	46.32	0
Quellón 1	1	0	0	0	0	0	0	0	0	0	0	90	0.738889	5.41	0	10.53	0	115.08
Quellón 1	2	0	0	0	0	0	0	0	0	0	0	50	0.136	4.262	1.745	26.85	0	67.75	0
Quellón 1	3	0	0	0	0	0	0	0	0	0	0	20	0	0	0	0	0	0	0
Quellón 1	4	0	0	0	0	0	0	0	0	0	0	0	nr	1.309	0	0	0	53.875	0
Quellón 1	5	0	0	0	0	0	0	0	0	0	0	20	0	0	nr	0
Quellón 1	6	0	0	0	0	0	0	0	0	0	0	0	nr	0	nr	0	45.76	8.44	0
Quellón 1	7	0	0	0	0	0	0	0	0	0	0	20	0	0	nr	0	226.8	7.76	0
Quellón 1	8	0	0	0	0	0	0	0	0	0	0	20	0.975	0	nr	0
Quellón 1	9	0	0	0	0	0	0	0	0	0	0	0	nr	0	nr	0	65.875	24.9167	0
Quellón 1	10	0	0	0	0	0	0	0	0	0	0	30	0	1.681	0	2.825	45.68	46.96	0
Quellón 1	11	0	0	0	0	0	0	0	0	0	0	10	9.42	5.96	0	21.5	0	9.3	0
Quellón 1	12	0	0.1	0	0	0.1	0	0	0	0	0	0	nr	0.279	nr	1.359	0	0	0
Quellón 1	13	0	0	0	0	0	0	0	0	0	0	30	0	7.322	4.1575	9.49	0	0	0
Quellón 1	14	0	0	0	0	0	0	0	0	0	0	0	nr	8.713	nr	11.03	0	7.2	0
Quellón 1	15	0	0	0	0	0	0	0	0	0	0	0	nr	4.294	nr	5.336	0	0	0
Quellón 1	16	0	0	0	0	0	0	0	0	0	0	40	0	2.87333	0.665	4.74667	0	0	0
Quellón 1	17	0	0	0	0	0	0	0	0	0	0	20	0	9.60375	3.44	9	7.125	78.84	0
Quellón 1	18	0	0	0	0	0	0	0	0	0	0	30	6.86667	6.8657	nr	17.638	0	34.08	0
Quellón 1	19	0	0	0	0	0	0	0	0	0	0	10	0	18.772	nr	24.855	0	83.04	0
Quellón 1	20	0	0	0	0	0	0	0	0	0	0	10	0	6.28889	nr	11.818	0	72.72	0
Quellón 2	1	0	0	0	0	0	0	0	0	0	0	0	nr	7.863	0	8.4275	0	0	0
Quellón 2	2	0	0	0	0	0	0	0	0	0	0	0	nr	9.877	0	7	33.28	0	0
Quellón 2	3	0	0	0	0	0	0	0	0	0	0	20	0.955	13.481	nr	7.71	0	0	9.24
Quellón 2	4	0	0	0	0	0	0	0	0	0	0	60	0	4.4925	nr	11.4625	37.12	6.24	0
Quellón 2	5	0	0	0	0	0	0	0	0	0	0	0	nr	13.948	nr	19.8967	0	7.625	0
Quellón 2	6	0	0	0	0	0	0	0	0	0	0	0	nr	3.282	nr	15.395
Quellón 2	7	0	0	0	0	0	0	0	0	0	0	0	nr	16.859	nr	13.7275	11.28	0	0
Quellón 2	8	0	0	0	0	0	0	0	0	0	0	0	nr	11.896	nr	20.9975	188	12.8	0
Quellón 2	9	0	0	0	0	0	0	0	0	0	0	0	nr	20.468	nr	25.298	10.44	0	0
Quellón 2	10	0	0	0	0	0	0	0	0	0	0	10	0	10.6822	nr	19.62	0	0	0
Quellón 2	11	0	0	0	0	0	0	0	0	0	0	10	3.81	19.57	nr	28.3033	0	41.76	0
Quellón 2	12	0	0	0	0	0	0	0	0	0	0	0	nr	2.09	nr	3	0	0	0
Quellón 2	13	0	0	0	0	0	0	0	0	0	0	0	nr	9.559	nr	12.58	0	0	0
Quellón 2	14	0	0	0	0	0	0	0	0	0	0	0	nr	8.648	nr	4.1175	0	0	0
Quellón 2	15	0	0	0	0	0	0	0	0	0	0	10	0	20.5511	nr	19.142	120.938	58.8	0
Quellón 2	16	0	0	0	0	0	0	0	0	0	0	10	0	13.4922	nr	14.802	38.4	0	0
Quellón 2	17	0	0	0	0	0	0	0	0	0	0	0	nr	7.92	nr	11.308	107.4	0	0
Quellón 2	18	0	0	0	0	0	0	0	0	0	0	0	nr	15.527	nr	17.05	0	10	0
Quellón 2	19	0	0	0	0	0	0	0	0	0	0	0	nr	12.4878	nr	9.68	0	0	0
Quellón 2	20	0	0	0	0	0	0	0	0	0	0	0	nr	1.975	nr	1.275	0	20	0
Santa Bárbara	1	0	0	0	0	0	0	0	0	0	0	0	nr	19.435	nr	27.3767	45.68	0	0
Santa Bárbara	2	0	0	0	0	0	0	0	0	0	0	0	nr	20.965	nr	26.144	81.12	0	0
Santa Bárbara	3	0	0	0	0	0	0	0	0	0	0	0	nr	25.48	nr	23.97	0	41.28	0
Santa Bárbara	4	0	0	0	0	0	0	0	0	0	0	0	nr	9.103	nr	3.0025	0	0	0
Santa Bárbara	5	0	0	0	0	0	0	0	0	0	0	30	9.41333	17.7885	nr	16.316	97.875	50.75	0
Santa Bárbara	6	0	0	0	0	0	0	0	0	0	0	0	nr	32.681	nr	9.804	84.96	23.6667	0
Santa Bárbara	7	0	0	0	0	0	0	0	0	0	0	20	12.975	21.5338	nr	29.758	0	15.5625	0
Santa Bárbara	8	0	0	0	0	0	0	0	0	0	0	0	nr	9.066	nr	27.148	116.88	46.24	0
Santa Bárbara	9	0	0	0	0	0	0	0	0	0	0	0	nr	18.399	nr	13.906	30.72	11.12	0
Santa Bárbara	10	0	0	0	0	0	0	0	0	0	0	0	nr	15.273	nr	17.5825	0	12.48	19.6667
Santa Bárbara	11	0	0	0	0	0	0	0	0	0	0	20	0	21.1444	nr	23.288	0	0	0
Santa Bárbara	12	0	0	0	0	0	0	0	0	0	0	0	nr	3.364	nr	19.775	0	0	0
Santa Bárbara	13	0	0	0	0	0	0	0	0	0	0	0	nr	16.846	nr	22.726	0	0	0
Santa Bárbara	14	0	0	0	0	0	0	0	0	0	0	0	nr	17.088	nr	15.896	0	0	0
Santa Bárbara	15	0	0	0	0	0	0	0	0	0	0	20	2.5	20.066	nr	9.7025	31.56	0	0
Santa Bárbara	16	0	0	0	0	0	0	0	0	0	0	0	nr	25.495	nr	35.79	105.36	0	0
Santa Bárbara	17	0	0	0	0	0	0	0	0	0	0	0	nr	8.198	nr	26.94	0	12.88	0
Santa Bárbara	18	0	0	0	0	0	0	0	0	0	0	0	nr	4.258	nr	13.77	0	12.84	0
Santa Bárbara	19	0	0	0	0	0	0	0	0	0	0	0	nr	3.3	nr	18.296	128.96	0	0
Santa Bárbara	20	0	0	0	0	0	0	0	0	0	0	0	nr	15.756	nr	32.0075	0	0	0
Valdivia	1	0	0	0	0	0	0	0	0.181818	0	0.181818	100	0.198	nr	0	nr	0	0	0
Valdivia	2	0	0	0	0	0	0	0	0	0.125	0.125	100	0.147	nr	0	1.545	0	0	0
Valdivia	3	0	0	0	0	0	0	0	0	0	0	100	0	nr	5.17	nr	0	0	0
Valdivia	4	0	0	0	0	0	0	0	0.117647	0	0.117647	100	0	nr	0	nr	169.44	0	9.9
Valdivia	5	0	0	0	0	0	0	0	0.9	0	0.9	100	0	nr	2.48	7.48	16.8	36.5	0
Valdivia	6	0	0	0	0	0	0	0	0	0	0	100	0	nr	1.81333	nr	0	0	0
Valdivia	7	0	0	0	0	0	0	0	0.307692	0	0.307692	100	0	nr	0.206	nr	0	16.56	1.5
Valdivia	8	0	0	0	0	0	0	0	0	0	0	10	0	nr	3.53	nr	0	0	62
Valdivia	9	0	0	0	0	0	0	0	0.111111	0	0.111111	100	0	nr	0	nr	8.92	0	0
Valdivia	10	0	0	0	0	0	0	0	0	0	0	100	0	nr	nr	5.395	0	39.36	0
Valdivia	11	0	0	0	0	0	0	0	0.125	0	0.125	90	0.1625	6.025	6.598	nr	12.68	0	10.64
Valdivia	12	0	0	0	0	0	0	0	0	0	0	90	0	6.59	0	nr	0	0	4.92
Valdivia	13	0	0	0	0	0	0	0	0	0	0	100	0	nr	8.36666	nr	0	13.75	0
Valdivia	14	0	0	0	0	0	0	0	0.333333	0	0.333333	100	0	nr	13.37	nr	8.53333	0	1.55
Valdivia	15	0	0	0	0	0	0	0	0.272727	0	0.272727	100	0	nr	9.805	nr	13.8	0	12.2
Valdivia	16	0	0	0	0	0	0	0	0.727273	0	0.727273	100	0	nr	1.528	nr	3.55	0	55.08
Valdivia	17	0	0	0	0	0	0	0	1.1	0	1.1	100	0	nr	0	nr	12.28	69.84	0
Valdivia	18	0	0	0	0	0	0	0	1.1	0	1.1	90	0	8.19	2.57	nr	0	0	37.4667
Valdivia	19	0	0	0	0	0	0	0	0.785714	0	0.785714	90	0	18.3	3.85333	nr	0	0	4.44
Valdivia	20	0	0	0	0	0	0	0	0.777778	0	0.777778	100	0	nr	0	nr	0	0	0
Yerba Loza	1	0	0	0	0	0	0	0	0	0	0	0	nr	7.78111	nr	3.9	0	70.6667	0
Yerba Loza	2	0	0	0	0	0	0	0	0	0	0	0	nr	1.013	nr	0	22.95	39.75	0
Yerba Loza	3	0	0	0	0	0	0	0	0	0	0	0	nr	0.73111	nr	5.918	48.72	111.36
Yerba Loza	4	0	0	0	0	0	0	0	0	0	0	0	nr	0.39	nr	4.258	0	16.9
Yerba Loza	5	0	0	0	0	0	0	0	0	0	0	0	nr	0.10888	nr	1.28	0	46.6	0
Yerba Loza	6	0	0	0	0	0	0	0	0	0	0	0	nr	1.719	nr	1.498	0	0	0
Yerba Loza	7	0	0	0	0	0	0	0	0	0	0	0	nr	4.05888	nr	4.482	7.8	0	0
Yerba Loza	8	0	0	0	0	0	0	0	0	0	0	0	nr	3.80222	0	5.56	79.56	11.04	0
Yerba Loza	9	0	0	0	0	0	0	0	0	0	0	0	nr	3.823	nr	0.2275	90.12	0	0
Yerba Loza	10	0	0	0	0	0	0	0	0	0	0	0	nr	3.092	nr	3.635	101.12	0	0
Yerba Loza	11	0	0	0	0	0	0	0	0	0	0	0	nr	3.78666	nr	6.446	7.12	0	0
Yerba Loza	12	0	0	0	0	0	0	0	0	0	0	0	nr	3.221	nr	0.7525	70.8	0	0
Yerba Loza	13	0	0	0	0	0	0	0	0	0	0	0	nr	6.125	nr	7.038	0	0
Yerba Loza	14	0	0	0	0	0	0	0	0	0	0	0	nr	5.83111	0	7.2175	0	10.8	0
Yerba Loza	15	0	0	0	0	0	0	0	0	0	0	0	nr	1.255	nr	6.5	0	0	0
Yerba Loza	16	0	0	0	0	0	0	0	0	0	0	0	nr	4.114	nr	6.955	9.95	65.8	0
Yerba Loza	17	0	0	0	0	0	0	0	0	0	0	0	nr	2.108	nr	7.284	43.68	0	0
Yerba Loza	18	0.08	0	0	0	0.08	0	0	0	0	0	0	nr	3.126	nr	12.894	0	47.92	0
Yerba Loza	19	0	0	0	0	0	0	0	0	0	0	0	nr	0.326	nr	9.52	35.52	0	34.96
Yerba Loza	20	0	0	0	0	0	0	0	0	0	0	0	nr	2.88	nr	6.204	0	0	0
